# Supplementary material for: Molecular weight dependence of structure and properties of chitosan oligomers
Source: Royal Society of Chemistry journal article supplement (doi:10.1039/c5ra08358c), 2015-01-01
Supplement: c5ra08358c1.pdf [file c5ra08358c1.pdf]

Table S1. Kinetic constants, A, B, K<sub>1</sub>, and K<sub>2</sub>, for depolymerization at different reaction temperatures

| Reaction<br>temperature (°C) | A    | B    | K <sub>1</sub> (min <sup>-1</sup> ) | K <sub>2</sub> (min <sup>-1</sup> ) |
|------------------------------|------|------|-------------------------------------|-------------------------------------|
| 30                           | 0.59 | 0.41 | 0.22                                | 0.027                               |
| 50                           | 0.99 | 0.01 | 0.44                                | 0.0027                              |
| 70                           | 0.99 | 0.01 | 0.53                                | 0.0042                              |

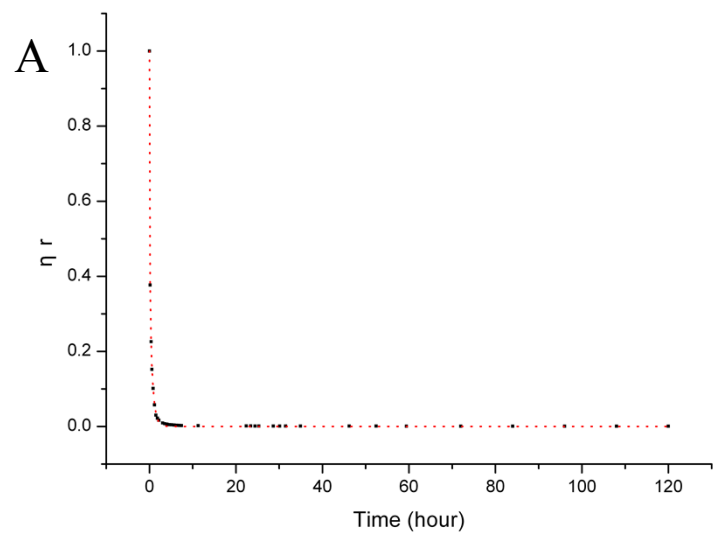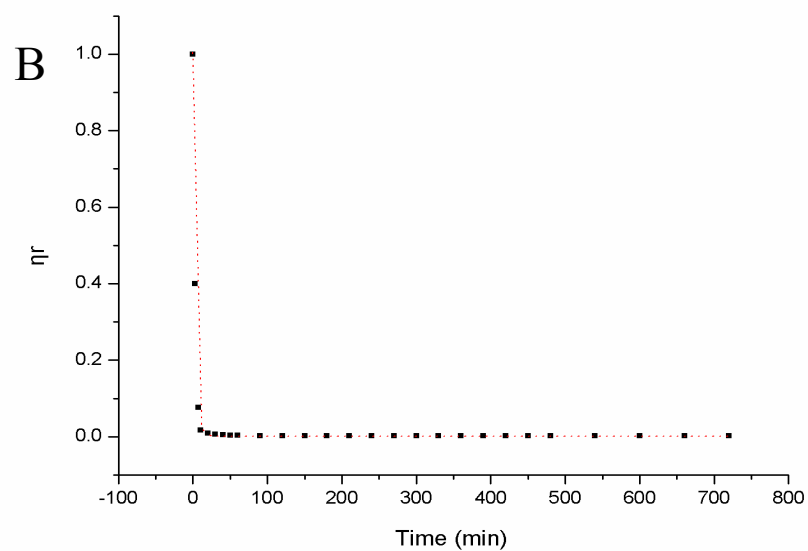

Fig. S1. Normalized apparent viscosity ( $\eta_r = \eta_t / \eta_0$ ) as a function of reaction time at 30°C (A) and 50°C (B).

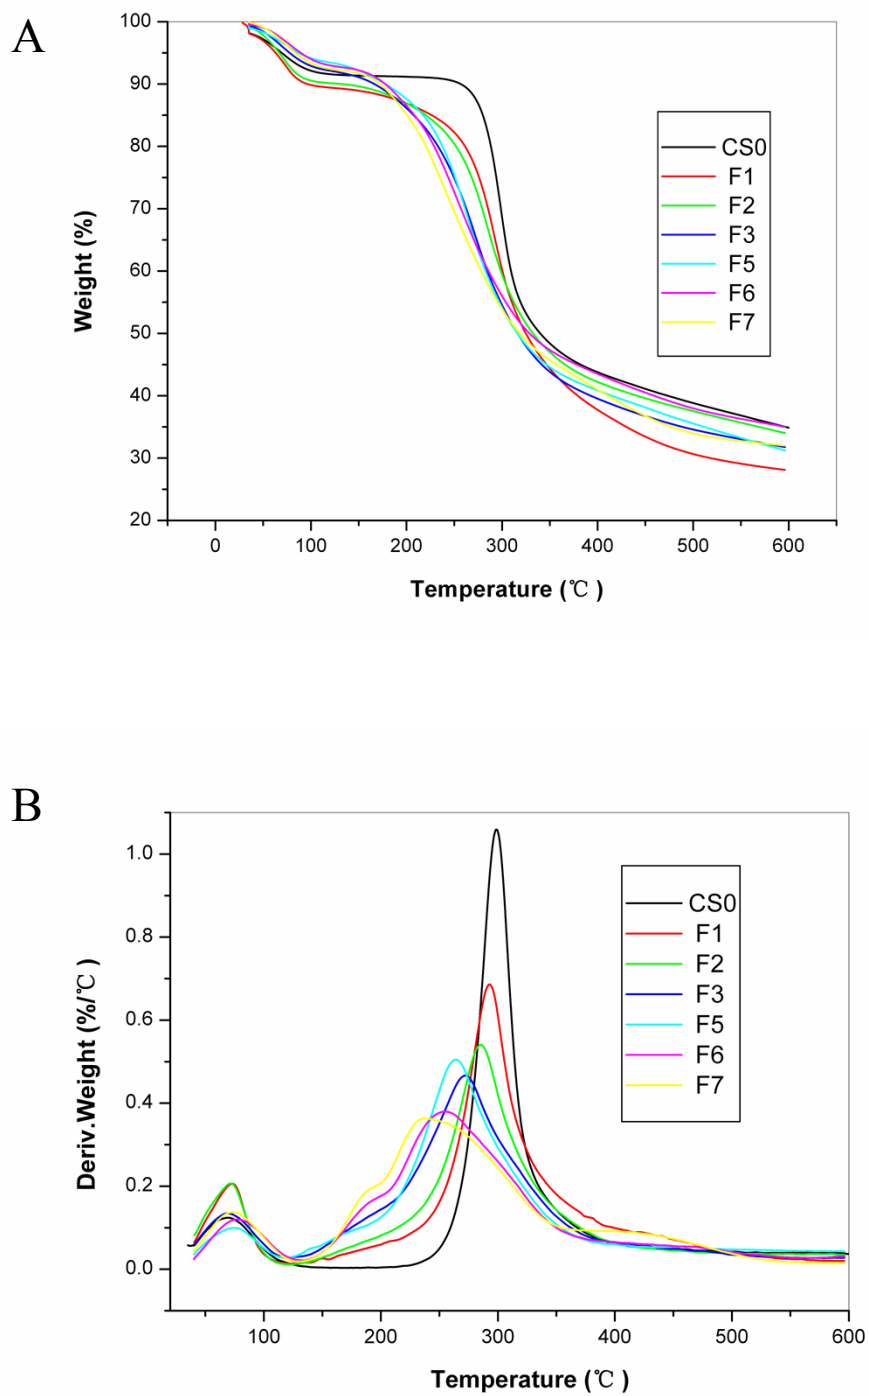

Fig. S2. TG (A) and DTG (B) curves for CS0 and prepared products.
